# Supplementary material for: RTK25: A Comprehensive Molecular Profiling Strategy in Cholangiocarcinoma Using an Integrated Bioinformatics Approach
Source: Pharmaceuticals (Basel). 2021 Sep 3;14(9):898. doi: 10.3390/ph14090898 (PMC8469883; doi:10.3390/ph14090898)
Supplement: Supplementary file 1 [file pharmaceuticals-14-00898-s001.zip › 3.Supplemental Table 2.xlsx]

## Sheet: Sheet1
Supplementary Table 2. Discordant signature match with DEGs from iLINCs.
SignatureId	Compound	Tissue	Concordance	pValue	nGenes	Cluster
CTRS_4809	BRD-K75293299	lung cancer	-0.376602	3.48e-10	260	1
CTRS_4819	BRD-K96431673	lung cancer	-0.375356	4.02e-10	260	1
CTRS_8810	Olaparib	thyroid cancer	-0.361754	1.86e-09	260	1
CTRS_635	Dacarbazine	autonomic ganglia cancer	-0.343045	1.36e-08	260	1
CTRS_8844	PLX-4720	thyroid cancer	-0.342452	1.45e-08	260	1
CTRS_4255	AZD-6482	liver cancer	-0.337527	2.39e-08	260	1
CTRS_871	Sunitinib	autonomic ganglia cancer	-0.334974	3.09e-08	260	1
CTRS_4698	ZSTK 474	liver cancer	-0.334261	3.32e-08	260	1
CTRS_1115	GSK2636771	bone cancer	-0.333305	3.66e-08	260	1
CTRS_67	Erlotinib	CTRP cell lines	-0.333001	3.77e-08	260	1
CTRS_5375	Erlotinib	non-haematopoietic and non-lymphoid cancer	-0.333001	3.77e-08	260	1
CTRS_4814	BRD-K86535717	lung cancer	-0.330489	4.83e-08	260	1
CTRS_1015	AC1O9BJ3	bone cancer	-0.330288	4.93e-08	260	1
CTRS_1362	SAR245409	bone cancer	-0.329436	5.36e-08	260	1
CTRS_939	Avicin-D	bone cancer	-0.329099	5.54e-08	260	1
CTRS_8589	BRD-K80183349	thyroid cancer	-0.326247	7.32e-08	260	1
CTRS_567	CHEMBL2355724	autonomic ganglia cancer	-0.323139	9.88e-08	260	1
CTRS_4956	KU-60019	lung cancer	-0.322211	1.08e-07	260	1
CTRS_6534	SB-431542	ovary cancer	-0.316181	1.91e-07	260	1
CTRS_4406	Dasatinib	liver cancer	-0.315982	1.95e-07	260	1
CTRS_1214	NSC19630	bone cancer	-0.314784	2.18e-07	260	1
CTRS_751	MLN 2238	autonomic ganglia cancer	-0.31438	2.26e-07	260	1
CTRS_5142	TGX 221	lung cancer	-0.311319	3e-07	260	1
CTRS_981	BRD-K04800985	bone cancer	-0.311122	3.05e-07	260	1
CTRS_765	CHEMBL1222381	autonomic ganglia cancer	-0.309216	3.63e-07	260	1
CTRS_1031	ZINC01050121	bone cancer	-0.308704	3.81e-07	260	1
CTRS_8939	Vorinostat	thyroid cancer	-0.308022	4.05e-07	260	1
CTRS_1339	Trametinib	bone cancer	-0.307504	4.25e-07	260	1
CTRS_2489	Cucurbitacin-I	endometrium cancer	-0.307439	4.27e-07	260	1
CTRS_8579	BRD-K61166597	thyroid cancer	-0.307335	4.31e-07	260	1
CTRS_1094	etomoxir	bone cancer	-0.307123	4.4e-07	260	1
CTRS_7248	CID-5951923	skin cancer	-0.307073	4.42e-07	260	1
CTRS_2565	KH-CB19	endometrium cancer	-0.30638	4.7e-07	260	1
CTRS_1080	Dasatinib	bone cancer	-0.306314	4.73e-07	260	1
CTRS_8539	BRD-A71883111	thyroid cancer	-0.305339	5.16e-07	260	1
CTRS_1185	ASN 05257430	bone cancer	-0.302618	6.59e-07	260	1
CTRS_8813	OSI-027	thyroid cancer	-0.302513	6.65e-07	260	1
CTRS_4906	FSC231	lung cancer	-0.302336	6.75e-07	260	1
CTRS_4820	BRD-K96970199	lung cancer	-0.301331	7.39e-07	260	1
CTRS_2694	Purmorphamine	endometrium cancer	-0.30124	7.44e-07	260	1
CTRS_1258	pitstop2	bone cancer	-0.300918	7.66e-07	260	1
CTRS_4590	pluripotin	liver cancer	-0.300236	8.14e-07	260	1
CTRS_1021	SPOX1_002925	bone cancer	-0.299665	8.56e-07	260	1
CTRS_1431	BRD-K04800985	breast cancer	-0.298825	9.21e-07	260	1
CTRS_967	BMS-270394	bone cancer	-0.298322	9.63e-07	260	1
CTRS_500	Avicin-D	autonomic ganglia cancer	-0.297215	1.06e-06	260	1
CTRS_8527	BIX01294	thyroid cancer	-0.29671	1.11e-06	260	1
CTRS_1747	PYR-41	breast cancer	-0.295863	1.19e-06	260	1
CTRS_2398	BG-51	endometrium cancer	-0.295762	1.2e-06	260	1
CTRS_474	BCL-LZH-4	CTRP cell lines	-0.293362	1.48e-06	260	1
CTRS_7708	compound 1B	soft tissue cancer	-0.292697	1.57e-06	260	1
CTRS_4428	FQI-1	liver cancer	-0.291467	1.74e-06	260	1
CTRS_1220	NUTLIN 3	bone cancer	-0.290697	1.86e-06	260	1
CTRS_7825	ASN 05257430	soft tissue cancer	-0.290474	1.9e-06	260	1
CTRS_7274	DBeQ	skin cancer	-0.290093	1.96e-06	260	1
CTRS_994	BRD-K33199242	bone cancer	-0.290051	1.96e-06	260	1
CTRS_1206	Nelarabine	bone cancer	-0.289857	2e-06	260	1
CTRS_7569	1S,3R-RSL-3	soft tissue cancer	-0.288106	2.32e-06	260	1
CTRS_4577	PF-4800567 hydrochloride	liver cancer	-0.287354	2.47e-06	260	1
CTRS_4894	Erlotinib	lung cancer	-0.287021	2.54e-06	260	1
CTRS_1122	HC-067047	bone cancer	-0.286542	2.64e-06	260	1
CTRS_1295	Sildenafil	bone cancer	-0.286485	2.65e-06	260	1
CTRS_1358	XL335	bone cancer	-0.286401	2.67e-06	260	1
CTRS_2739	SR1001	endometrium cancer	-0.285997	2.76e-06	260	1
CTRS_5216	BCL-LZH-4	non-haematopoietic and non-lymphoid cancer	-0.285381	2.91e-06	260	1
CTRS_634	Dabrafenib	autonomic ganglia cancer	-0.284477	3.14e-06	260	1
CTRS_5110	Sitagliptin	lung cancer	-0.283703	3.35e-06	260	1
CTRS_2914	SPOX1_002925	haematopoietic and lymphoid tissue cancer	-0.28361	3.37e-06	260	1
CTRS_8926	SMR001317659	thyroid cancer	-0.283293	3.46e-06	260	1
CTRS_7408	CHEMBL2136735	skin cancer	-0.28301	3.54e-06	260	1
CTRS_8612	C6-ceramide	thyroid cancer	-0.282242	3.77e-06	260	1
CTRS_7118	Axitinib	skin cancer	-0.281828	3.91e-06	260	1
CTRS_1236	palmostatin B	bone cancer	-0.281693	3.95e-06	260	1
CTRS_2440	BRD-K99006945	endometrium cancer	-0.281669	3.96e-06	260	1
CTRS_703	KO143	autonomic ganglia cancer	-0.281143	4.13e-06	260	1
CTRS_2448	ZINC01050121	endometrium cancer	-0.281133	4.13e-06	260	1
CTRS_548	CHEMBL3182046	autonomic ganglia cancer	-0.28096	4.19e-06	260	1
CTRS_1329	TGX 221	bone cancer	-0.280245	4.45e-06	260	1
CTRS_806	869288-64-2	autonomic ganglia cancer	-0.279682	4.66e-06	260	1
CTRS_882	TG100-115	autonomic ganglia cancer	-0.279657	4.67e-06	260	1
CTRS_4508	MK-2206	liver cancer	-0.279568	4.7e-06	260	1
CTRS_8563	BRD-K34485477	thyroid cancer	-0.278283	5.22e-06	260	1
CTRS_1330	Thalidomide	bone cancer	-0.277992	5.34e-06	260	1
CTRS_2370	BMS-195614	endometrium cancer	-0.277706	5.47e-06	260	1
CTRS_1270	PYR-41	bone cancer	-0.276877	5.85e-06	260	1
CTRS_7230	Canertinib	skin cancer	-0.275976	6.29e-06	260	1
CTRS_4970	LY2157299	lung cancer	-0.275418	6.57e-06	260	1
CTRS_632	Cytarabine	autonomic ganglia cancer	-0.275079	6.75e-06	260	1
CTRS_4726	AZD-6482	lung cancer	-0.274972	6.81e-06	260	1
CTRS_484	3-Cl-AHPC	autonomic ganglia cancer	-0.27466	6.98e-06	260	1
CTRS_975	BRD-A71883111	bone cancer	-0.274109	7.3e-06	260	1
CTRS_8508	AZD4547	thyroid cancer	-0.273489	7.67e-06	260	1
CTRS_9664	CAY10603	urinary tract cancer	-0.273019	7.96e-06	260	1
CTRS_6901	MK-0752	pancreas cancer	-0.272632	8.21e-06	260	1
CTRS_8749	4LY1	thyroid cancer	-0.271854	8.73e-06	260	1
CTRS_4746	Blebbistatin	lung cancer	-0.271717	8.83e-06	260	1
CTRS_572	BRD-K71781559	autonomic ganglia cancer	-0.271096	9.27e-06	260	1
CTRS_6726	BRD-K75293299	pancreas cancer	-0.270158	9.98e-06	260	1
CTRS_6731	BRD-K86535717	pancreas cancer	-0.270158	9.98e-06	260	1
CTRS_5362	Dasatinib	non-haematopoietic and non-lymphoid cancer	-0.26856	1.13e-05	260	1
CTRS_720	AC1MSUFC	autonomic ganglia cancer	-0.268459	1.14e-05	260	1
CTRS_9797	ZINC68199948	urinary tract cancer	-0.268295	1.15e-05	260	1
CTRS_4362	Idelalisib	liver cancer	-0.26807	1.18e-05	260	1
CTRS_8853	Pyrazolanthrone	thyroid cancer	-0.267805	1.2e-05	260	1
CTRS_6653	HSCI1_000314	pancreas cancer	-0.267624	1.22e-05	260	1
CTRS_6997	Pyrazolanthrone	pancreas cancer	-0.267529	1.23e-05	260	1
CTRS_4796	BRD-K50799972	lung cancer	-0.267498	1.23e-05	260	1
CTRS_8274	LY2157299	stomach cancer	-0.267113	1.27e-05	260	1
CTRS_846	Selumetinib	autonomic ganglia cancer	-0.266525	1.33e-05	260	1
CTRS_819	PLX-4720	autonomic ganglia cancer	-0.266375	1.34e-05	260	1
CTRS_1023	BRD-K99006945	bone cancer	-0.266263	1.35e-05	260	1
CTRS_5397	GSK-3 Inhibitor IX	non-haematopoietic and non-lymphoid cancer	-0.265933	1.39e-05	260	1
CTRS_8838	PIK-93	thyroid cancer	-0.26592	1.39e-05	260	1
CTRS_2654	Olaparib	endometrium cancer	-0.26577	1.4e-05	260	1
CTRS_2337	Apatinib Hydrochloride	endometrium cancer	-0.265375	1.45e-05	260	1
CTRS_2708	RO4929097	endometrium cancer	-0.264885	1.5e-05	260	1
CTRS_813	PIK-93	autonomic ganglia cancer	-0.264813	1.51e-05	260	1
CTRS_8521	Betulinic acid	thyroid cancer	-0.264471	1.55e-05	260	1
CTRS_986	BRD-K16147474	bone cancer	-0.264084	1.6e-05	260	1
CTRS_4744	birinapant	lung cancer	-0.264039	1.6e-05	260	1
CTRS_8799	NSC48300	thyroid cancer	-0.263599	1.66e-05	260	1
CTRS_1439	CHEMBL3182046	breast cancer	-0.263205	1.71e-05	260	1
CTRS_2434	CHEMBL2152368	endometrium cancer	-0.263041	1.73e-05	260	1
CTRS_4876	Cytochalasin B	lung cancer	-0.262948	1.74e-05	260	1
CTRS_901	UNC-0321	autonomic ganglia cancer	-0.262881	1.75e-05	260	1
CTRS_633	Cytochalasin B	autonomic ganglia cancer	-0.262732	1.77e-05	260	1
CTRS_1927	BRD-K33199242	central nervous system cancer	-0.262713	1.78e-05	260	1
CTRS_8911	Teniposide	thyroid cancer	-0.261629	1.93e-05	260	1
CTRS_5133	Tamatinib	lung cancer	-0.261267	1.98e-05	260	1
CTRS_9265	CHEMBL1222381	upper aerodigestive tract cancer	-0.261202	1.99e-05	260	1
CTRS_6540	Semagacestat	ovary cancer	-0.261199	1.99e-05	260	1
CTRS_4263	BCL-LZH-4	liver cancer	-0.260864	2.04e-05	260	1
CTRS_8961	Alisertib	upper aerodigestive tract cancer	-0.260647	2.08e-05	260	1
CTRS_868	StemRegenin 1	autonomic ganglia cancer	-0.260591	2.09e-05	260	1
CTRS_1430	BRD-K02492147	breast cancer	-0.259769	2.22e-05	260	1
CTRS_7444	PF-4800567 hydrochloride	skin cancer	-0.259751	2.22e-05	260	1
CTRS_985	BRD-K14844214	bone cancer	-0.259494	2.27e-05	260	1
CTRS_210	SJ 172550	CTRP cell lines	-0.259217	2.31e-05	260	1
CTRS_4639	Sorafenib	liver cancer	-0.259129	2.33e-05	260	1
CTRS_9160	Pictilisib	upper aerodigestive tract cancer	-0.258825	2.38e-05	260	1
CTRS_6643	AZD-6482	pancreas cancer	-0.258798	2.39e-05	260	1
CTRS_246	BRD-K75293299	CTRP cell lines	-0.258426	2.46e-05	260	1
CTRS_5290	BRD-K75293299	non-haematopoietic and non-lymphoid cancer	-0.258426	2.46e-05	260	1
CTRS_6957	OSI-027	pancreas cancer	-0.258426	2.46e-05	260	1
CTRS_4643	SR1001	liver cancer	-0.258117	2.51e-05	260	1
CTRS_4881	Dasatinib	lung cancer	-0.257361	2.66e-05	260	1
CTRS_4998	ML312	lung cancer	-0.257257	2.68e-05	260	1
CTRS_1142	KH-CB19	bone cancer	-0.256888	2.76e-05	260	1
CTRS_7393	Myricetin	skin cancer	-0.256692	2.8e-05	260	1
CTRS_760	Necrostatin	autonomic ganglia cancer	-0.25631	2.88e-05	260	1
CTRS_6754	Idelalisib	pancreas cancer	-0.25569	3.01e-05	260	1
CTRS_6737	BRD-K96970199	pancreas cancer	-0.255623	3.03e-05	260	1
CTRS_221	Myriocin	CTRP cell lines	-0.255558	3.04e-05	260	1
CTRS_4654	Tamoxifen	liver cancer	-0.255546	3.04e-05	260	1
CTRS_663	GANT-61	autonomic ganglia cancer	-0.255255	3.11e-05	260	1
CTRS_5094	Saracatinib	lung cancer	-0.255231	3.12e-05	260	1
CTRS_496	AT-406	autonomic ganglia cancer	-0.255052	3.16e-05	260	1
CTRS_7832	ML320	soft tissue cancer	-0.254517	3.28e-05	260	1
CTRS_7491	ZINC77024257	skin cancer	-0.253997	3.41e-05	260	1
CTRS_442	A-804598	CTRP cell lines	-0.253677	3.49e-05	260	1
CTRS_4296	BRD-K16147474	liver cancer	-0.253321	3.59e-05	260	1
CTRS_6718	BRD-K61166597	pancreas cancer	-0.253053	3.66e-05	260	1
CTRS_6978	Phloretin	pancreas cancer	-0.252519	3.8e-05	260	1
CTRS_6990	ZINC68199948	pancreas cancer	-0.252277	3.87e-05	260	1
CTRS_1469	BRD-K61166597	breast cancer	-0.252241	3.88e-05	260	1
CTRS_5436	KU-55933	non-haematopoietic and non-lymphoid cancer	-0.252062	3.93e-05	260	1
CTRS_1293	SGX-523	bone cancer	-0.251755	4.02e-05	260	1
CTRS_859	4,11-Diethyl-4,9-dihydroxy-1H-pyrano[3',4':6,7]indolizino[1,2-b]quinoline-3,14(4H,12H)-dione	autonomic ganglia cancer	-0.251673	4.05e-05	260	1
CTRS_6784	Compound 23 citrate	pancreas cancer	-0.251176	4.2e-05	260	1
CTRS_856	skepinone-L	autonomic ganglia cancer	-0.250509	4.4e-05	260	1
CTRS_4586	PIK-93	liver cancer	-0.25045	4.42e-05	260	1
CTRS_2499	Dasatinib	endometrium cancer	-0.25037	4.45e-05	260	1
CTRS_2478	CIL56	endometrium cancer	-0.249818	4.63e-05	260	1
CTRS_1127	IC-87114	bone cancer	-0.249476	4.75e-05	260	1
CTRS_4546	NSC30930	liver cancer	-0.249251	4.82e-05	260	1
CTRS_2338	AT-406	endometrium cancer	-0.248889	4.95e-05	260	1
CTRS_5051	PD318088	lung cancer	-0.248778	4.99e-05	260	1
CTRS_4426	fluvastatin	liver cancer	-0.248293	5.17e-05	260	1
CTRS_6816	FGIN1-27	pancreas cancer	-0.247963	5.29e-05	260	1
CTRS_5174	WZ8040	lung cancer	-0.247807	5.35e-05	260	1
CTRS_6969	CHEMBL416418	pancreas cancer	-0.247698	5.39e-05	260	1
CTRS_8126	BRD-K99006945	stomach cancer	-0.247686	5.4e-05	260	1
CTRS_8565	BRD-K37390332	thyroid cancer	-0.247056	5.65e-05	260	1
CTRS_4067	Nilotinib	large intestine cancer	-0.247	5.67e-05	260	1
CTRS_1216	NSC30930	bone cancer	-0.246794	5.75e-05	260	1
CTRS_1051	CHIR-99021	bone cancer	-0.24669	5.8e-05	260	1
CTRS_5069	pluripotin	lung cancer	-0.246623	5.83e-05	260	1
CTRS_8658	Dasatinib	thyroid cancer	-0.246179	6.01e-05	260	1
CTRS_8481	Sepantronium	stomach cancer	-0.245466	6.33e-05	260	1
CTRS_4240	Alisertib	liver cancer	-0.245281	6.41e-05	260	1
CTRS_499	austocystin D	autonomic ganglia cancer	-0.245179	6.46e-05	260	1
CTRS_8113	BRD-K75293299	stomach cancer	-0.245171	6.46e-05	260	1
CTRS_7309	GSK4112	skin cancer	-0.24468	6.69e-05	260	1
CTRS_2410	2-(Allylamino)-3-chloronaphthoquinone	endometrium cancer	-0.24462	6.72e-05	260	1
CTRS_6824	Fulvestrant	pancreas cancer	-0.244037	7e-05	260	1
CTRS_2520	fluvastatin	endometrium cancer	-0.243888	7.07e-05	260	1
CTRS_7442	PF-184	skin cancer	-0.243751	7.14e-05	260	1
CTRS_2564	JW-74	endometrium cancer	-0.243436	7.3e-05	260	1
CTRS_4899	FGIN1-27	lung cancer	-0.243289	7.38e-05	260	1
CTRS_7492	SGX-523	skin cancer	-0.243132	7.46e-05	260	1
CTRS_8684	Fumonisin-B1	thyroid cancer	-0.242985	7.54e-05	260	1
CTRS_2419	BRD-K61166597	endometrium cancer	-0.242957	7.55e-05	260	1
CTRS_817	pluripotin	autonomic ganglia cancer	-0.24276	7.66e-05	260	1
CTRS_2467	Ch-55	endometrium cancer	-0.241992	8.08e-05	260	1
CTRS_1044	CCT036477	bone cancer	-0.241975	8.09e-05	260	1
CTRS_4568	Parbendazole	liver cancer	-0.241686	8.26e-05	260	1
CTRS_1324	temozolomide	bone cancer	-0.241579	8.32e-05	260	1
CTRS_2435	BRD-K92856060	endometrium cancer	-0.241401	8.42e-05	260	1
CTRS_6903	MK-2206	pancreas cancer	-0.241034	8.64e-05	260	1
CTRS_964	BIX01294	bone cancer	-0.24096	8.69e-05	260	1
CTRS_3212	BMS-387032	haematopoietic and lymphoid tissue cancer	-0.240814	8.78e-05	260	1
CTRS_5224	Doramapimod	non-haematopoietic and non-lymphoid cancer	-0.240802	8.78e-05	260	1
CTRS_7079	Valdecoxib	pancreas cancer	-0.240694	8.85e-05	260	1
CTRS_7694	CHIR-99021	soft tissue cancer	-0.240563	8.93e-05	260	1
CTRS_5401	GSK4112	non-haematopoietic and non-lymphoid cancer	-0.290537	3.12406e-06	249	2
CTRS_2510	Erastin	endometrium cancer	-0.286065	4.48487e-06	249	2
CTRS_221	Myriocin	CTRP cell lines	-0.280192	7.14372e-06	249	2
CTRS_2562	JW-480	endometrium cancer	-0.277427	8.86195e-06	249	2
CTRS_2464	Cediranib	endometrium cancer	-0.27403	1.15125e-05	249	2
CTRS_370	GSK4112	CTRP cell lines	-0.272662	1.27789e-05	249	2
CTRS_9131	DBeQ	upper aerodigestive tract cancer	-0.272252	1.31836e-05	249	2
CTRS_2436	SPOX1_002925	endometrium cancer	-0.269629	1.60745e-05	249	2
CTRS_6868	KO143	pancreas cancer	-0.266978	1.96e-05	249	2
CTRS_5203	AZ-3146	non-haematopoietic and non-lymphoid cancer	-0.263593	2.51727e-05	249	2
CTRS_4251	AZ-3146	liver cancer	-0.263142	2.60195e-05	249	2
CTRS_2789	WZ8040	endometrium cancer	-0.262271	2.77298e-05	249	2
CTRS_4435	Gefitinib	liver cancer	-0.25993	3.28735e-05	249	2
CTRS_1503	C6-ceramide	breast cancer	-0.258314	3.6936e-05	249	2
CTRS_5152	Trametinib	lung cancer	-0.257693	3.86196e-05	249	2
CTRS_4240	Alisertib	liver cancer	-0.257172	4.00862e-05	249	2
CTRS_4702	968	lung cancer	-0.254963	4.69158e-05	249	2
CTRS_5067	pitstop2	lung cancer	-0.253666	5.14231e-05	249	2
CTRS_1562	Erlotinib	breast cancer	-0.251731	5.89072e-05	249	2
CTRS_4794	BRD-K48477130	lung cancer	-0.251691	5.90719e-05	249	2
CTRS_1464	BRD-K50799972	breast cancer	-0.250919	6.23462e-05	249	2
CTRS_5351	Crizotinib	non-haematopoietic and non-lymphoid cancer	-0.249686	6.79281e-05	249	2
CTRS_2601	MK-0752	endometrium cancer	-0.248644	7.30089e-05	249	2
CTRS_5851	elocalcitol	oesophagus cancer	-0.247984	7.64106e-05	249	2
CTRS_1411	Doramapimod	breast cancer	-0.247451	7.92626e-05	249	2
CTRS_4703	A-804598	lung cancer	-0.247105	8.1172e-05	249	2
CTRS_8985	BCL-LZH-4	upper aerodigestive tract cancer	-0.246662	8.36733e-05	249	2
CTRS_499	austocystin D	autonomic ganglia cancer	-0.24628	8.58928e-05	249	2
CTRS_4568	Parbendazole	liver cancer	-0.24586	8.8394e-05	249	2
CTRS_2853	BRD-A71883111	haematopoietic and lymphoid tissue cancer	-0.24545	9.08965e-05	249	2
CTRS_2426	AC1O9BJ3	endometrium cancer	-0.244613	9.62247e-05	249	2
CTRS_8612	C6-ceramide	thyroid cancer	-0.244019	0.000100183	249	2
CTRS_4198	Tosedostat	large intestine cancer	-0.243906	0.000100954	249	2
CTRS_2570	KU0060648	endometrium cancer	-0.243479	0.00010391	249	2
CTRS_676	GW 405833	autonomic ganglia cancer	-0.242699	0.000109532	249	2
CTRS_8552	Broad-Sai-609	thyroid cancer	-0.242217	0.000113141	249	2
CTRS_4611	Rita	liver cancer	-0.240585	0.000126218	249	2
CTRS_4380	Cyclosporine	liver cancer	-0.239429	0.000136321	249	2
CTRS_4439	GSK-3 Inhibitor IX	liver cancer	-0.238981	0.000140438	249	2
CTRS_4505	mitomycin	liver cancer	-0.238911	0.000141089	249	2
CTRS_2766	Tosedostat	endometrium cancer	-0.238748	0.000142628	249	2
CTRS_5051	PD318088	lung cancer	-0.236063	0.000170223	249	2
CTRS_6320	Dasatinib	ovary cancer	-0.234871	0.000184013	249	2
CTRS_5101	Selumetinib	lung cancer	-0.234467	0.000188925	249	2
CTRS_4562	OSI-930	liver cancer	-0.234161	0.000192719	249	2
CTRS_2530	Gefitinib	endometrium cancer	-0.23406	0.00019399	249	2
CTRS_4910	MLS006011051	lung cancer	-0.23398	0.000194999	249	2
CTRS_5767	BRD-K66532283	oesophagus cancer	-0.233575	0.000200191	249	2
CTRS_8559	BRD-K30019337	thyroid cancer	-0.233049	0.000207124	249	2
CTRS_4785	BRD-K34485477	lung cancer	-0.233027	0.000207414	249	2
CTRS_8696	GSK 525762A	thyroid cancer	-0.232434	0.000215513	249	2
CTRS_5650	CHEMBL492797	non-haematopoietic and non-lymphoid cancer	-0.232222	0.000218482	249	2
CTRS_4912	Gefitinib	lung cancer	-0.231832	0.000224048	249	2
CTRS_4555	TAE-684	liver cancer	-0.23151	0.000228733	249	2
CTRS_2788	WZ 4002	endometrium cancer	-0.231066	0.000235335	249	2
CTRS_2342	Avicin-D	endometrium cancer	-0.231028	0.00023591	249	2
CTRS_2613	ML258	endometrium cancer	-0.230972	0.00023676	249	2
CTRS_5094	Saracatinib	lung cancer	-0.230692	0.000241045	249	2
CTRS_2450	Brefeldin A	endometrium cancer	-0.230509	0.00024388	249	2
CTRS_5142	TGX 221	lung cancer	-0.230232	0.000248252	249	2
CTRS_2651	TAE-684	endometrium cancer	-0.230077	0.000250711	249	2
CTRS_2440	BRD-K99006945	endometrium cancer	-0.229063	0.000267445	249	2
CTRS_3891	CCT036477	large intestine cancer	-0.228903	0.000270185	249	2
CTRS_2725	Simvastatin	endometrium cancer	-0.228835	0.000271348	249	2
CTRS_4377	CHM-1	liver cancer	-0.22836	0.000279658	249	2
CTRS_4428	FQI-1	liver cancer	-0.227989	0.000286298	249	2
CTRS_2374	BMS-754807	endometrium cancer	-0.227588	0.000293652	249	2
CTRS_6684	BRD-K13999467	pancreas cancer	-0.226935	0.000306	249	2
CTRS_4756	BRD-A05715709	lung cancer	-0.225286	0.000339353	249	2
CTRS_2542	HBX-41108	endometrium cancer	-0.224134	0.000364633	249	2
CTRS_505	AZD-1480	autonomic ganglia cancer	-0.222776	0.000396698	249	2
CTRS_4384	CIL55A	liver cancer	-0.222376	0.000406616	249	2
CTRS_8996	Blebbistatin	upper aerodigestive tract cancer	-0.222016	0.000415756	249	2
CTRS_274	Veliparib	CTRP cell lines	-0.221206	0.00043699	249	2
CTRS_5615	Tamoxifen	non-haematopoietic and non-lymphoid cancer	-0.221045	0.000441341	249	2
CTRS_2627	Navitoclax	endometrium cancer	-0.220866	0.000446202	249	2
CTRS_3939	Epigalocatechin Gallate	large intestine cancer	-0.220834	0.000447082	249	2
CTRS_6825	Fumonisin-B1	pancreas cancer	-0.220445	0.000457877	249	2
CTRS_4822	BRD-K99006945	lung cancer	-0.220315	0.000461512	249	2
CTRS_856	skepinone-L	autonomic ganglia cancer	-0.2202	0.000464786	249	2
CTRS_2376	bosutinib	endometrium cancer	-0.219577	0.000482802	249	2
CTRS_2453	C6-ceramide	endometrium cancer	-0.219523	0.000484387	249	2
CTRS_5229	BMS-195614	non-haematopoietic and non-lymphoid cancer	-0.219151	0.00049548	249	2
CTRS_6687	BRD-K17060750	pancreas cancer	-0.21894	0.000501882	249	2
CTRS_8714	CAY10603	thyroid cancer	-0.21884	0.000504955	249	2
CTRS_682	I-BET151	autonomic ganglia cancer	-0.218579	0.000513009	249	2
CTRS_4877	Dabrafenib	lung cancer	-0.217547	0.000546121	249	2
CTRS_3270	WZ8040	haematopoietic and lymphoid tissue cancer	-0.217211	0.000557287	249	2
CTRS_8950	16Beta-bromoandrosterone	upper aerodigestive tract cancer	-0.217207	0.00055744	249	2
CTRS_4894	Erlotinib	lung cancer	-0.217176	0.000558472	249	2
CTRS_4475	KU0060648	liver cancer	-0.216972	0.000565383	249	2
CTRS_2576	L-685458	endometrium cancer	-0.216625	0.000577339	249	2
CTRS_3767	Avicin-D	large intestine cancer	-0.216371	0.000586235	249	2
CTRS_1599	IC-87114	breast cancer	-0.215752	0.000608415	249	2
CTRS_4208	UNC0638	large intestine cancer	-0.215561	0.0006154	249	2
CTRS_5033	NVP-BSK805	lung cancer	-0.214984	0.000637016	249	2
CTRS_4282	bosutinib	liver cancer	-0.214945	0.00063852	249	2
CTRS_5403	GSK 525762A	non-haematopoietic and non-lymphoid cancer	-0.21427	0.000664715	249	2
CTRS_6600	Vandetanib	ovary cancer	-0.214234	0.000666136	249	2
CTRS_4466	1268524-70-4	liver cancer	-0.213907	0.000679241	249	2
CTRS_379	vorapaxar	CTRP cell lines	-0.213898	0.000679621	249	2
CTRS_6152	Afatinib	ovary cancer	-0.213399	0.00070002	249	2
CTRS_2541	GW843682X	endometrium cancer	-0.213303	0.000704051	249	2
CTRS_6739	BRD-K99006945	pancreas cancer	-0.213236	0.000706832	249	2
CTRS_4361	Cabozantinib	liver cancer	-0.212819	0.000724484	249	2
CTRS_2499	Dasatinib	endometrium cancer	-0.2124	0.000742657	249	2
CTRS_2767	TPCA-1	endometrium cancer	-0.212201	0.000751426	249	2
CTRS_8019	AT-406	stomach cancer	-0.211648	0.000776311	249	2
CTRS_751	MLN 2238	autonomic ganglia cancer	-0.2112	0.000797026	249	2
CTRS_19	Tamoxifen	CTRP cell lines	-0.210894	0.000811473	249	2
CTRS_6824	Fulvestrant	pancreas cancer	-0.210608	0.000825205	249	2
CTRS_6901	MK-0752	pancreas cancer	-0.210437	0.000833468	249	2
CTRS_276	Afatinib	CTRP cell lines	-0.209991	0.00085551	249	2
CTRS_5645	Veliparib	non-haematopoietic and non-lymphoid cancer	-0.209933	0.00085842	249	2
CTRS_67	Erlotinib	CTRP cell lines	-0.209866	0.000861796	249	2
CTRS_5375	Erlotinib	non-haematopoietic and non-lymphoid cancer	-0.209866	0.000861796	249	2
CTRS_8644	Compound 23 citrate	thyroid cancer	-0.209807	0.000864737	249	2
CTRS_5129	Sunitinib	lung cancer	-0.209481	0.000881327	249	2
CTRS_1847	ZSTK 474	breast cancer	-0.209399	0.000885565	249	2
CTRS_3730	Valdecoxib	kidney cancer	-0.208743	0.000919962	249	2
CTRS_2437	BRD-K96431673	endometrium cancer	-0.208441	0.000936276	249	2
CTRS_6675	BRD-A86708339	pancreas cancer	-0.207775	0.00097305	249	2
CTRS_239	BRD-K04800985	CTRP cell lines	-0.207522	0.000987396	249	2
CTRS_8636	CIL55A	thyroid cancer	-0.207511	0.000987985	249	2
CTRS_2628	Necrostatin	endometrium cancer	-0.207394	0.000994706	249	2
CTRS_247	MLS003179190	CTRP cell lines	-0.207232	0.00100403	249	2
CTRS_6986	pluripotin	pancreas cancer	-0.206887	0.0010242	249	2
CTRS_8583	BRD-K66532283	thyroid cancer	-0.206866	0.00102542	249	2
CTRS_4598	Purmorphamine	liver cancer	-0.206108	0.00107106	249	2
CTRS_4550	NUTLIN 3	liver cancer	-0.205845	0.00108736	249	2
CTRS_6860	IU1	pancreas cancer	-0.205656	0.0010992	249	2
CTRS_4363	Canertinib	liver cancer	-0.205583	0.00110379	249	2
CTRS_6624	ABT737	pancreas cancer	-0.205552	0.00110577	249	2
CTRS_335	Lapatinib	CTRP cell lines	-0.205421	0.00111408	249	2
CTRS_6752	C6-ceramide	pancreas cancer	-0.204929	0.00114584	249	2
CTRS_6695	BG-51	pancreas cancer	-0.204599	0.00116757	249	2
CTRS_4649	Sunitinib	liver cancer	-0.204495	0.0011745	249	2
CTRS_567	CHEMBL2355724	autonomic ganglia cancer	-0.204406	0.00118047	249	2
CTRS_9583	CIL55	urinary tract cancer	-0.204158	0.00119727	249	2
CTRS_5436	KU-55933	non-haematopoietic and non-lymphoid cancer	-0.202995	0.00127886	249	2
CTRS_1917	BRD-K17060750	central nervous system cancer	-0.202916	0.00128459	249	2
CTRS_4254	AZD4547	liver cancer	-0.20274	0.00129739	249	2
CTRS_6837	GSK4112	pancreas cancer	-0.202703	0.00130009	249	2
CTRS_7314	HBX-41108	skin cancer	-0.202571	0.00130984	249	2
CTRS_4529	nakiterpiosin	liver cancer	-0.202394	0.00132298	249	2
CTRS_2711	Saracatinib	endometrium cancer	-0.201774	0.00136998	249	2
CTRS_5345	COL-3	non-haematopoietic and non-lymphoid cancer	-0.20177	0.00137024	249	2
CTRS_813	PIK-93	autonomic ganglia cancer	-0.201763	0.00137083	249	2
CTRS_6898	MI-1	pancreas cancer	-0.201466	0.00139384	249	2
CTRS_9385	temozolomide	upper aerodigestive tract cancer	-0.201237	0.0014119	249	2
CTRS_4693	WZ8040	liver cancer	-0.20104	0.0014276	249	2
CTRS_4365	CAY-10594	liver cancer	-0.200277	0.00148981	249	2
CTRS_4615	Saracatinib	liver cancer	-0.200047	0.00150903	249	2
CTRS_505	AZD-1480	autonomic ganglia cancer	-0.197064	0.000110264	380	3
CTRS_676	GW 405833	autonomic ganglia cancer	-0.184824	0.000292026	380	3
CTRS_1633	Linifanib	breast cancer	-0.183362	0.000326747	380	3
CTRS_6859	Itrazole	pancreas cancer	-0.180294	0.000412465	380	3
CTRS_1621	KU0060648	breast cancer	-0.179272	0.000445376	380	3
CTRS_2366	birinapant	endometrium cancer	-0.167677	0.00103396	380	3
CTRS_2601	MK-0752	endometrium cancer	-0.374326	3.04584e-18	505	4
CTRS_474	BCL-LZH-4	CTRP cell lines	-0.319622	1.85697e-13	505	4
CTRS_442	A-804598	CTRP cell lines	-0.315892	3.64515e-13	505	4
CTRS_8552	Broad-Sai-609	thyroid cancer	-0.309712	1.09151e-12	505	4
CTRS_2338	AT-406	endometrium cancer	-0.307578	1.58475e-12	505	4
CTRS_3453	DBeQ	kidney cancer	-0.30454	2.68085e-12	505	4
CTRS_3173	Purmorphamine	haematopoietic and lymphoid tissue cancer	-0.303235	3.35349e-12	505	4
CTRS_276	Afatinib	CTRP cell lines	-0.300032	5.78158e-12	505	4
CTRS_2440	BRD-K99006945	endometrium cancer	-0.29467	1.41794e-11	505	4
CTRS_2907	BRD-K80183349	haematopoietic and lymphoid tissue cancer	-0.290387	2.86457e-11	505	4
CTRS_747	ML258	autonomic ganglia cancer	-0.288365	3.97664e-11	505	4
CTRS_3709	Fedratinib	kidney cancer	-0.287006	4.94911e-11	505	4
CTRS_3609	OSI-027	kidney cancer	-0.285127	6.68572e-11	505	4
CTRS_3588	Nilotinib	kidney cancer	-0.283061	9.2826e-11	505	4
CTRS_402	fluvastatin	CTRP cell lines	-0.28263	9.93669e-11	505	4
CTRS_364	BRD-K34099515	CTRP cell lines	-0.28212	1.07688e-10	505	4
CTRS_9433	Arachidonyl Trifluoromethylketone	urinary tract cancer	-0.281541	1.17971e-10	505	4
CTRS_621	COL-3	autonomic ganglia cancer	-0.279952	1.51306e-10	505	4
CTRS_3627	869288-64-2	kidney cancer	-0.277429	2.23977e-10	505	4
CTRS_8696	GSK 525762A	thyroid cancer	-0.277252	2.30187e-10	505	4
CTRS_5108	Simvastatin	lung cancer	-0.277213	2.31569e-10	505	4
CTRS_7619	BRD-A02303741	soft tissue cancer	-0.273358	4.18132e-10	505	4
CTRS_3281	Arachidonyl Trifluoromethylketone	kidney cancer	-0.272047	5.10083e-10	505	4
CTRS_4622	Selumetinib	liver cancer	-0.271094	5.89077e-10	505	4
CTRS_3593	NSC23766	kidney cancer	-0.270988	5.9856e-10	505	4
CTRS_336	BG-51	CTRP cell lines	-0.270692	6.25779e-10	505	4
CTRS_9840	BMS-387032	urinary tract cancer	-0.270283	6.65517e-10	505	4
CTRS_8705	IC-87114	thyroid cancer	-0.269897	7.05141e-10	505	4
CTRS_3145	Pazopanib	haematopoietic and lymphoid tissue cancer	-0.268605	8.55456e-10	505	4
CTRS_4254	AZD4547	liver cancer	-0.268173	9.12437e-10	505	4
CTRS_411	abiraterone	CTRP cell lines	-0.265351	1.3854e-09	505	4
CTRS_7625	BRD-K02492147	soft tissue cancer	-0.264575	1.55283e-09	505	4
CTRS_7865	TAE-684	soft tissue cancer	-0.263016	1.95037e-09	505	4
CTRS_4475	KU0060648	liver cancer	-0.261083	2.5818e-09	505	4
CTRS_3521	KPT185	kidney cancer	-0.259074	3.44785e-09	505	4
CTRS_3957	GANT-61	large intestine cancer	-0.257721	4.18361e-09	505	4
CTRS_4628	CX-4945 (Silmitasertib)	liver cancer	-0.256159	5.22297e-09	505	4
CTRS_4405	Darinaparsin	liver cancer	-0.255261	5.92944e-09	505	4
CTRS_882	TG100-115	autonomic ganglia cancer	-0.253915	7.16536e-09	505	4
CTRS_9541	CHEMBL2152368	urinary tract cancer	-0.253322	7.78608e-09	505	4
CTRS_8645	CHEMBL520231	thyroid cancer	-0.252699	8.4939e-09	505	4
CTRS_7862	NVP-ADW742	soft tissue cancer	-0.252244	9.05024e-09	505	4
CTRS_4464	Itrazole	liver cancer	-0.251961	9.41421e-09	505	4
CTRS_5106	Sildenafil	lung cancer	-0.251611	9.88314e-09	505	4
CTRS_4586	PIK-93	liver cancer	-0.250256	1.19229e-08	505	4
CTRS_8887	67200-34-4	thyroid cancer	-0.249961	1.24175e-08	505	4
CTRS_8612	C6-ceramide	thyroid cancer	-0.249278	1.36417e-08	505	4
CTRS_1752	R428	breast cancer	-0.249223	1.37457e-08	505	4
CTRS_8553	BRD-K26531177	thyroid cancer	-0.248492	1.51955e-08	505	4
CTRS_9816	Ruxolitinib	urinary tract cancer	-0.248016	1.6219e-08	505	4
CTRS_2913	BRD-K92856060	haematopoietic and lymphoid tissue cancer	-0.247543	1.73029e-08	505	4
CTRS_632	Cytarabine	autonomic ganglia cancer	-0.246519	1.98904e-08	505	4
CTRS_2968	BSPBIO_001592	haematopoietic and lymphoid tissue cancer	-0.245831	2.18367e-08	505	4
CTRS_732	MI-1	autonomic ganglia cancer	-0.245228	2.36929e-08	505	4
CTRS_9045	BRD-K50799972	upper aerodigestive tract cancer	-0.244881	2.48294e-08	505	4
CTRS_7732	Epigalocatechin Gallate	soft tissue cancer	-0.244771	2.52002e-08	505	4
CTRS_676	GW 405833	autonomic ganglia cancer	-0.244014	2.7901e-08	505	4
CTRS_703	KO143	autonomic ganglia cancer	-0.243593	2.9525e-08	505	4
CTRS_2984	ELCPK	haematopoietic and lymphoid tissue cancer	-0.243512	2.98455e-08	505	4
CTRS_103	NSC30930	CTRP cell lines	-0.242274	3.52202e-08	505	4
CTRS_5198	AT 7867	non-haematopoietic and non-lymphoid cancer	-0.241203	4.06132e-08	505	4
CTRS_9731	N9-Isopropylolomoucine	urinary tract cancer	-0.240029	4.74412e-08	505	4
CTRS_2359	Belinostat	endometrium cancer	-0.239193	5.29676e-08	505	4
CTRS_3146	PD153035 (Hydrochloride)	haematopoietic and lymphoid tissue cancer	-0.239145	5.32991e-08	505	4
CTRS_8636	CIL55A	thyroid cancer	-0.23893	5.48331e-08	505	4
CTRS_8911	Teniposide	thyroid cancer	-0.238661	5.68031e-08	505	4
CTRS_9388	TG100-115	upper aerodigestive tract cancer	-0.238602	5.72436e-08	505	4
CTRS_3404	Brivanib	kidney cancer	-0.238498	5.803e-08	505	4
CTRS_3289	AM-580	kidney cancer	-0.238406	5.87307e-08	505	4
CTRS_30	AC1MSUFC	CTRP cell lines	-0.238365	5.90478e-08	505	4
CTRS_8949	ZSTK 474	thyroid cancer	-0.238183	6.04768e-08	505	4
CTRS_3001	FQI-2	haematopoietic and lymphoid tissue cancer	-0.237828	6.33517e-08	505	4
CTRS_570	BRD-K66532283	autonomic ganglia cancer	-0.237823	6.33939e-08	505	4
CTRS_711	L-685458	autonomic ganglia cancer	-0.237618	6.51097e-08	505	4
CTRS_9663	Isonicotinohydroxamic acid	urinary tract cancer	-0.237613	6.51582e-08	505	4
CTRS_5773	BRD-K80183349	oesophagus cancer	-0.236824	7.22177e-08	505	4
CTRS_859	4,11-Diethyl-4,9-dihydroxy-1H-pyrano[3',4':6,7]indolizino[1,2-b]quinoline-3,14(4H,12H)-dione	autonomic ganglia cancer	-0.236405	7.62577e-08	505	4
CTRS_7286	Erlotinib	skin cancer	-0.236305	7.72567e-08	505	4
CTRS_3744	Sepantronium	kidney cancer	-0.236258	7.77295e-08	505	4
CTRS_6104	TGX 221	oesophagus cancer	-0.235482	8.59498e-08	505	4
CTRS_7641	BRD-K37390332	soft tissue cancer	-0.235078	9.056e-08	505	4
CTRS_896	SMR001317659	autonomic ganglia cancer	-0.234785	9.40557e-08	505	4
CTRS_4546	NSC30930	liver cancer	-0.234707	9.50005e-08	505	4
CTRS_3302	AZD-6482	kidney cancer	-0.234396	9.88848e-08	505	4
CTRS_3603	TAE-684	kidney cancer	-0.234166	1.01862e-07	505	4
CTRS_4141	Salermide	large intestine cancer	-0.233578	1.09845e-07	505	4
CTRS_4561	OSI-027	liver cancer	-0.233288	1.14004e-07	505	4
CTRS_4574	Pevonedistat	liver cancer	-0.233158	1.15919e-07	505	4
CTRS_3601	Dactolisib	kidney cancer	-0.23298	1.18599e-07	505	4
CTRS_2831	BCL-LZH-4	haematopoietic and lymphoid tissue cancer	-0.232654	1.23638e-07	505	4
CTRS_3501	IC-87114	kidney cancer	-0.231672	1.40127e-07	505	4
CTRS_9577	CHM-1	urinary tract cancer	-0.231451	1.44117e-07	505	4
CTRS_1480	BRD-K84807411	breast cancer	-0.231405	1.4497e-07	505	4
CTRS_3941	Erismodegib	large intestine cancer	-0.23124	1.4804e-07	505	4
CTRS_1704	Obatoclax	breast cancer	-0.230962	1.53352e-07	505	4
CTRS_7574	ABT737	soft tissue cancer	-0.2309	1.54556e-07	505	4
CTRS_7733	Erastin	soft tissue cancer	-0.230568	1.61189e-07	505	4
CTRS_3447	Cytochalasin B	kidney cancer	-0.229994	1.73322e-07	505	4
CTRS_5183	968	non-haematopoietic and non-lymphoid cancer	-0.229206	1.91409e-07	505	4
CTRS_2682	PIK-93	endometrium cancer	-0.229022	1.95891e-07	505	4
CTRS_2874	BG-51	haematopoietic and lymphoid tissue cancer	-0.228779	2.01955e-07	505	4
CTRS_9668	1268524-70-4	urinary tract cancer	-0.228732	2.03168e-07	505	4
CTRS_727	4LY1	autonomic ganglia cancer	-0.228297	2.1455e-07	505	4
CTRS_2089	JW-480	central nervous system cancer	-0.227813	2.27954e-07	505	4
CTRS_765	CHEMBL1222381	autonomic ganglia cancer	-0.227642	2.32849e-07	505	4
CTRS_3261	VER 155008	haematopoietic and lymphoid tissue cancer	-0.227617	2.33598e-07	505	4
CTRS_1724	PF-4800567 hydrochloride	breast cancer	-0.227581	2.34634e-07	505	4
CTRS_1809	Fedratinib	breast cancer	-0.227298	2.43066e-07	505	4
CTRS_9260	necrostatin-7	upper aerodigestive tract cancer	-0.226539	2.67162e-07	505	4
CTRS_3479	Fumonisin-B1	kidney cancer	-0.226497	2.6857e-07	505	4
CTRS_8838	PIK-93	thyroid cancer	-0.226405	2.71645e-07	505	4
CTRS_4069	NPC-26	large intestine cancer	-0.226391	2.72098e-07	505	4
CTRS_8146	CBB-1007	stomach cancer	-0.226197	2.78759e-07	505	4
CTRS_4552	NVP-ADW742	liver cancer	-0.22596	2.8705e-07	505	4
CTRS_9763	Omacetaxine Mepesuccinate	urinary tract cancer	-0.22548	3.04607e-07	505	4
CTRS_1007	SCHEMBL12684744	bone cancer	-0.225328	3.10384e-07	505	4
CTRS_7188	BRD-K48477130	skin cancer	-0.225143	3.17572e-07	505	4
CTRS_7712	Crizotinib	soft tissue cancer	-0.225066	3.20605e-07	505	4
CTRS_3185	Rigosertib	haematopoietic and lymphoid tissue cancer	-0.224968	3.24523e-07	505	4
CTRS_4294	BRD-K13999467	liver cancer	-0.224932	3.25933e-07	505	4
CTRS_354	BRD-K48477130	CTRP cell lines	-0.224911	3.26793e-07	505	4
CTRS_8929	Tubastatin A	thyroid cancer	-0.224598	3.39657e-07	505	4
CTRS_7626	BRD-K04800985	soft tissue cancer	-0.224593	3.39833e-07	505	4
CTRS_7770	Imatinib	soft tissue cancer	-0.224504	3.43579e-07	505	4
CTRS_4068	CHEMBL2136735	large intestine cancer	-0.224035	3.63987e-07	505	4
CTRS_9528	MLS003179190	urinary tract cancer	-0.223907	3.69757e-07	505	4
CTRS_360	VAF-347	CTRP cell lines	-0.223848	3.72423e-07	505	4
CTRS_5164	Veliparib	lung cancer	-0.223658	3.81211e-07	505	4
CTRS_5645	Veliparib	non-haematopoietic and non-lymphoid cancer	-0.223647	3.81751e-07	505	4
CTRS_472	SZ4TA2	CTRP cell lines	-0.223595	3.8418e-07	505	4
CTRS_430	birinapant	CTRP cell lines	-0.223495	3.88931e-07	505	4
CTRS_3519	KI8751	kidney cancer	-0.223468	3.90187e-07	505	4
CTRS_7818	MK-0752	soft tissue cancer	-0.22303	4.11669e-07	505	4
CTRS_9854	Tacedinaline	urinary tract cancer	-0.222635	4.32034e-07	505	4
CTRS_3040	1268524-70-4	haematopoietic and lymphoid tissue cancer	-0.222514	4.38458e-07	505	4
CTRS_6913	ML258	pancreas cancer	-0.222401	4.44547e-07	505	4
CTRS_3530	Panobinostat	kidney cancer	-0.222177	4.56828e-07	505	4
CTRS_1714	pandacostat	breast cancer	-0.222165	4.57484e-07	505	4
CTRS_3580	Necrostatin	kidney cancer	-0.222018	4.65772e-07	505	4
CTRS_2561	1268524-70-4	endometrium cancer	-0.221333	5.06179e-07	505	4
CTRS_706	AZD-2014	autonomic ganglia cancer	-0.221254	5.11073e-07	505	4
CTRS_3045	KHS101	haematopoietic and lymphoid tissue cancer	-0.221237	5.1211e-07	505	4
CTRS_2653	Obatoclax	endometrium cancer	-0.221094	5.21075e-07	505	4
CTRS_3155	PF750	haematopoietic and lymphoid tissue cancer	-0.220892	5.33948e-07	505	4
CTRS_4562	OSI-930	liver cancer	-0.220818	5.38786e-07	505	4
CTRS_536	BRD-A86708339	autonomic ganglia cancer	-0.220695	5.46839e-07	505	4
CTRS_3059	Lenvatinib (E7080)	haematopoietic and lymphoid tissue cancer	-0.220369	5.68766e-07	505	4
CTRS_32	Cyclophosphamide	CTRP cell lines	-0.219909	6.01269e-07	505	4
CTRS_2484	compound 1B	endometrium cancer	-0.219644	6.2075e-07	505	4
CTRS_2405	BRD-K37390332	endometrium cancer	-0.21892	6.77128e-07	505	4
CTRS_9367	Sotrastaurin	upper aerodigestive tract cancer	-0.218831	6.84366e-07	505	4
CTRS_3730	Valdecoxib	kidney cancer	-0.217886	7.66254e-07	505	4
CTRS_5403	GSK 525762A	non-haematopoietic and non-lymphoid cancer	-0.2178	7.74188e-07	505	4
CTRS_6976	PF750	pancreas cancer	-0.216872	8.6461e-07	505	4
CTRS_5909	JW-74	oesophagus cancer	-0.216851	8.66791e-07	505	4
CTRS_7169	BRD-K26531177	skin cancer	-0.216847	8.67119e-07	505	4
CTRS_6643	AZD-6482	pancreas cancer	-0.216711	8.81285e-07	505	4
CTRS_496	AT-406	autonomic ganglia cancer	-0.216486	9.0509e-07	505	4
CTRS_379	vorapaxar	CTRP cell lines	-0.21643	9.11106e-07	505	4
CTRS_339	Erismodegib	CTRP cell lines	-0.2161	9.4741e-07	505	4
CTRS_9441	alvocidib	urinary tract cancer	-0.216043	9.53882e-07	505	4
CTRS_5953	ASN 05257430	oesophagus cancer	-0.21597	9.62157e-07	505	4
CTRS_3589	CHEMBL2136735	kidney cancer	-0.215867	9.73964e-07	505	4
CTRS_3126	NVP-231	haematopoietic and lymphoid tissue cancer	-0.215753	9.8714e-07	505	4
CTRS_3013	GSK J4	haematopoietic and lymphoid tissue cancer	-0.215465	1.02121e-06	505	4
CTRS_7110	AM-580	skin cancer	-0.215338	1.03664e-06	505	4
CTRS_5852	Entinostat	oesophagus cancer	-0.215057	1.0715e-06	505	4
CTRS_2917	BRD-K97651142	haematopoietic and lymphoid tissue cancer	-0.214906	1.0908e-06	505	4
CTRS_1371	A-804598	breast cancer	-0.21479	1.10577e-06	505	4
CTRS_640	Decitabine	autonomic ganglia cancer	-0.214536	1.13932e-06	505	4
CTRS_3425	Ciclopirox	kidney cancer	-0.214461	1.14939e-06	505	4
CTRS_8844	PLX-4720	thyroid cancer	-0.214446	1.1513e-06	505	4
CTRS_4477	KU-55933	liver cancer	-0.214399	1.15768e-06	505	4
CTRS_9710	MK-2206	urinary tract cancer	-0.214365	1.1624e-06	505	4
CTRS_635	Dacarbazine	autonomic ganglia cancer	-0.214323	1.16812e-06	505	4
CTRS_5200	Avicin-D	non-haematopoietic and non-lymphoid cancer	-0.214123	1.19583e-06	505	4
CTRS_9247	ML320	upper aerodigestive tract cancer	-0.213811	1.24031e-06	505	4
CTRS_4510	CID-2858522	liver cancer	-0.213809	1.24064e-06	505	4
CTRS_7998	SAR245409	soft tissue cancer	-0.213654	1.26327e-06	505	4
CTRS_728	Methotrexate	autonomic ganglia cancer	-0.213544	1.27971e-06	505	4
CTRS_682	I-BET151	autonomic ganglia cancer	-0.213487	1.28821e-06	505	4
CTRS_4428	FQI-1	liver cancer	-0.212899	1.37967e-06	505	4
CTRS_3056	Lapatinib	haematopoietic and lymphoid tissue cancer	-0.212758	1.40257e-06	505	4
CTRS_7928	SCH-79797	soft tissue cancer	-0.212541	1.43851e-06	505	4
CTRS_448	Alpelisib	CTRP cell lines	-0.212266	1.48513e-06	505	4
CTRS_4542	NPC-26	liver cancer	-0.211582	1.60783e-06	505	4
CTRS_2847	BMS-536924	haematopoietic and lymphoid tissue cancer	-0.211429	1.63659e-06	505	4
CTRS_1802	Tamoxifen	breast cancer	-0.211254	1.67006e-06	505	4
CTRS_2817	Axitinib	haematopoietic and lymphoid tissue cancer	-0.211248	1.6711e-06	505	4
CTRS_4444	GSK 525762A	liver cancer	-0.211136	1.69283e-06	505	4
CTRS_667	Gemcitabine	autonomic ganglia cancer	-0.211004	1.71889e-06	505	4
CTRS_4739	Betulinic acid	lung cancer	-0.210043	1.92025e-06	505	4
CTRS_7630	BRD-K14844214	soft tissue cancer	-0.209998	1.9301e-06	505	4
CTRS_2796	1S,3R-RSL-3	haematopoietic and lymphoid tissue cancer	-0.209399	2.06753e-06	505	4
CTRS_8663	Doxorubicin	thyroid cancer	-0.209008	2.16211e-06	505	4
CTRS_4691	WP1130	liver cancer	-0.209003	2.16326e-06	505	4
CTRS_3057	Panobinostat	haematopoietic and lymphoid tissue cancer	-0.208902	2.18838e-06	505	4
CTRS_2416	BRD-K51831558	endometrium cancer	-0.208828	2.20702e-06	505	4
CTRS_4127	PYR-41	large intestine cancer	-0.208751	2.22648e-06	505	4
CTRS_8810	Olaparib	thyroid cancer	-0.208622	2.25955e-06	505	4
CTRS_5622	Fedratinib	non-haematopoietic and non-lymphoid cancer	-0.2084	2.31748e-06	505	4
CTRS_7560	WP1130	skin cancer	-0.2084	2.31759e-06	505	4
CTRS_8644	Compound 23 citrate	thyroid cancer	-0.208059	2.40942e-06	505	4
CTRS_4466	1268524-70-4	liver cancer	-0.208023	2.4191e-06	505	4
CTRS_3183	BL003-049-HDAC3	haematopoietic and lymphoid tissue cancer	-0.207885	2.45735e-06	505	4
CTRS_9744	CHEMBL2136735	urinary tract cancer	-0.207803	2.4804e-06	505	4
CTRS_9370	SR1001	upper aerodigestive tract cancer	-0.207795	2.48284e-06	505	4
CTRS_2576	L-685458	endometrium cancer	-0.20774	2.49843e-06	505	4
CTRS_9558	Brivanib	urinary tract cancer	-0.207723	2.50307e-06	505	4
CTRS_2821	AZD4547	haematopoietic and lymphoid tissue cancer	-0.207113	2.68245e-06	505	4
CTRS_4755	BRD-A02303741	lung cancer	-0.206922	2.74134e-06	505	4
CTRS_3526	KW-2449	kidney cancer	-0.206743	2.79726e-06	505	4
CTRS_8541	Merck-Ketone	thyroid cancer	-0.2065	2.87509e-06	505	4
CTRS_2565	KH-CB19	endometrium cancer	-0.206364	2.91966e-06	505	4
CTRS_4153	CHEMBL258148	large intestine cancer	-0.20631	2.9375e-06	505	4
CTRS_6905	CID-2858522	pancreas cancer	-0.205966	3.05369e-06	505	4
CTRS_4427	Foretinib	liver cancer	-0.20588	3.08347e-06	505	4
CTRS_2238	Saracatinib	central nervous system cancer	-0.205846	3.09515e-06	505	4
CTRS_7647	CHEMBL2381520	soft tissue cancer	-0.205771	3.12151e-06	505	4
CTRS_4251	AZ-3146	liver cancer	-0.205725	3.1378e-06	505	4
CTRS_9271	NSC19630	upper aerodigestive tract cancer	-0.205623	3.17385e-06	505	4
CTRS_6152	Afatinib	ovary cancer	-0.205616	3.17637e-06	505	4
CTRS_633	Cytochalasin B	autonomic ganglia cancer	-0.20548	3.22524e-06	505	4
CTRS_2901	BRD-K66532283	haematopoietic and lymphoid tissue cancer	-0.205318	3.2846e-06	505	4
CTRS_8792	Nilotinib	thyroid cancer	-0.205283	3.29747e-06	505	4
CTRS_3307	AZD-1152-HQPA	kidney cancer	-0.205207	3.32574e-06	505	4
CTRS_3072	4LY1	haematopoietic and lymphoid tissue cancer	-0.20509	3.36977e-06	505	4
CTRS_7896	PIK-93	soft tissue cancer	-0.204412	3.63572e-06	505	4
CTRS_8652	Cytarabine	thyroid cancer	-0.2044	3.64033e-06	505	4
CTRS_6238	BRD-K52037352	ovary cancer	-0.204189	3.7273e-06	505	4
CTRS_3393	BRD-K99006945	kidney cancer	-0.203616	3.97337e-06	505	4
CTRS_3105	Narciclasine	haematopoietic and lymphoid tissue cancer	-0.203023	4.24434e-06	505	4
CTRS_4643	SR1001	liver cancer	-0.202964	4.27216e-06	505	4
CTRS_2708	RO4929097	endometrium cancer	-0.202805	4.34812e-06	505	4
CTRS_3386	PCI-34051	kidney cancer	-0.202563	4.46623e-06	505	4
CTRS_3417	Cediranib	kidney cancer	-0.202293	4.60213e-06	505	4
CTRS_2747	Tacedinaline	endometrium cancer	-0.202236	4.63116e-06	505	4
CTRS_8794	NPC-26	thyroid cancer	-0.202212	4.64316e-06	505	4
CTRS_3740	WZ 4002	kidney cancer	-0.200756	5.45157e-06	505	4
CTRS_3043	JW-74	haematopoietic and lymphoid tissue cancer	-0.200747	5.45659e-06	505	4
CTRS_3516	JW-74	kidney cancer	-0.20047	5.62532e-06	505	4
CTRS_2636	Nilotinib	endometrium cancer	-0.200157	5.82176e-06	505	4
CTRS_7573	ABT-199 (GDC-0199)	soft tissue cancer	-0.200032	5.90185e-06	505	4
CTRS_5760	BRD-K51831558	oesophagus cancer	-0.651471	4.01953e-05	33	5
CTRS_5903	istradefylline	oesophagus cancer	-0.637037	6.71086e-05	33	5
CTRS_5775	Broad-Sai-560	oesophagus cancer	-0.598889	0.000231261	33	5
CTRS_8300	ML258	stomach cancer	-0.593422	0.000272649	33	5
CTRS_5964	MLN 2480	oesophagus cancer	-0.582962	0.000370595	33	5
CTRS_5681	Avicin-D	oesophagus cancer	-0.582383	0.000376825	33	5
CTRS_6981	Pifithrin MU	pancreas cancer	-0.574452	0.000472126	33	5
CTRS_3968	GSK4112	large intestine cancer	-0.574141	0.000476267	33	5
CTRS_6196	bosutinib	ovary cancer	-0.573764	0.000481323	33	5
CTRS_7021	SGX-523	pancreas cancer	-0.567512	0.000572425	33	5
CTRS_8386	Quizartinib	stomach cancer	-0.562792	0.000650988	33	5
CTRS_8271	Lomeguatrib	stomach cancer	-0.562582	0.000654697	33	5
CTRS_8194	Entinostat	stomach cancer	-0.561282	0.000678066	33	5
CTRS_3309	CYTO7H11	kidney cancer	-0.560495	0.000692564	33	5
CTRS_9598	CHEMBL436817	urinary tract cancer	-0.557868	0.000742967	33	5
CTRS_2728	SJ 172550	endometrium cancer	-0.551644	0.000875473	33	5
CTRS_4623	Semagacestat	liver cancer	-0.549531	0.000924973	33	5
CTRS_3687	Sorafenib	kidney cancer	-0.54353	0.00107926	33	5
CTRS_8426	SR1001	stomach cancer	-0.542029	0.0011212	33	5
CTRS_5440	L-685458	non-haematopoietic and non-lymphoid cancer	-0.538119	0.00123728	33	5
CTRS_5547	Piplartine	non-haematopoietic and non-lymphoid cancer	-0.537249	0.00126448	33	5
CTRS_8368	Pifithrin MU	stomach cancer	-0.537076	0.00126996	33	5
CTRS_9694	LY2157299	urinary tract cancer	-0.526871	0.00163199	33	5
CTRS_9636	Pictilisib	urinary tract cancer	-0.526559	0.00164435	33	5
CTRS_796	(1Ar,7as,10as,10br)-1a,5-Dimethyl-8-methylidene-2,3,6,7,7a,8,10a,10b-octahydrooxireno[9,10]cyclodeca[1,2-b]furan-9(1ah)-one	autonomic ganglia cancer	-0.524314	0.00173571	33	5
CTRS_5789	ST021200	oesophagus cancer	-0.521118	0.00187346	33	5
CTRS_169	L-685458	CTRP cell lines	-0.519512	0.00194618	33	5
CTRS_1760	Ruxolitinib	breast cancer	-0.518746	0.00198177	33	5
CTRS_8109	BRD-K66532283	stomach cancer	-0.514493	0.00218963	33	5
CTRS_3368	CHEMBL2381520	kidney cancer	-0.514315	0.00219877	33	5
CTRS_214	CHEMBL436817	CTRP cell lines	-0.513082	0.0022627	33	5
CTRS_5354	CHEMBL436817	non-haematopoietic and non-lymphoid cancer	-0.513082	0.0022627	33	5
CTRS_4204	PG 490	large intestine cancer	-0.510307	0.00241253	33	5
CTRS_9437	AC55649	urinary tract cancer	-0.50971	0.00244588	33	5
CTRS_1038	Idelalisib	bone cancer	-0.508139	0.00253553	33	5
CTRS_3424	CL-976	kidney cancer	-0.507896	0.00254965	33	5
CTRS_9605	Darinaparsin	urinary tract cancer	-0.505998	0.00266235	33	5
CTRS_6973	PF-4800567 hydrochloride	pancreas cancer	-0.505867	0.00267025	33	5
CTRS_8294	BAS 02002358	stomach cancer	-0.500141	0.00303775	33	5
CTRS_8066	BRD-K02492147	stomach cancer	-0.497509	0.0032208	33	5
CTRS_5832	Crizotinib	oesophagus cancer	-0.495508	0.00336636	33	5
CTRS_9168	GSK2636771	upper aerodigestive tract cancer	-0.493564	0.00351316	33	5
CTRS_6454	Neratinib	ovary cancer	-0.493041	0.00355352	33	5
CTRS_9804	Pyrazolanthrone	urinary tract cancer	-0.492448	0.00359984	33	5
CTRS_5270	BRD-K41597374	non-haematopoietic and non-lymphoid cancer	-0.49207	0.00362969	33	5
CTRS_3583	Nelarabine	kidney cancer	-0.492035	0.00363245	33	5
CTRS_9718	TL_HRAS26	urinary tract cancer	-0.490622	0.00374576	33	5
CTRS_5887	HBX-41108	oesophagus cancer	-0.49035	0.00376797	33	5
CTRS_3700	Tacrolimus	kidney cancer	-0.487353	0.00401984	33	5
CTRS_4026	CHEMBL3347630	large intestine cancer	-0.486679	0.00407842	33	5
CTRS_3881	Brivanib	large intestine cancer	-0.484199	0.0043004	33	5
CTRS_4931	IC-87114	lung cancer	-0.482213	0.00448555	33	5
CTRS_2676	PF750	endometrium cancer	-0.482137	0.00449285	33	5
CTRS_9821	SB525334	urinary tract cancer	-0.481339	0.00456925	33	5
CTRS_5957	ML239	oesophagus cancer	-0.47877	0.0048229	33	5
CTRS_3449	Dacarbazine	kidney cancer	-0.476375	0.00507032	33	5
CTRS_3956	Fumonisin-B1	large intestine cancer	-0.475436	0.00517016	33	5
CTRS_6990	ZINC68199948	pancreas cancer	-0.474237	0.00530017	33	5
CTRS_2201	PF 543	central nervous system cancer	-0.473147	0.00542085	33	5
CTRS_190	AZD7545	CTRP cell lines	-0.472933	0.0054448	33	5
CTRS_442	A-804598	CTRP cell lines	-0.471893	0.00556255	33	5
CTRS_8249	JW-480	stomach cancer	-0.470109	0.00576951	33	5
CTRS_7947	spautin-1	soft tissue cancer	-0.469143	0.00588434	33	5
CTRS_3474	Foretinib	kidney cancer	-0.468343	0.00598093	33	5
CTRS_7256	COL-3	skin cancer	-0.467615	0.00606994	33	5
CTRS_988	CHEMBL3182046	bone cancer	-0.467437	0.00609198	33	5
CTRS_5552	PLX-4720	non-haematopoietic and non-lymphoid cancer	-0.466751	0.0061771	33	5
CTRS_6889	BDBM50127227	pancreas cancer	-0.465724	0.00630662	33	5
CTRS_2447	STK219801	endometrium cancer	-0.465355	0.00635374	33	5
CTRS_9869	Tipifarnib	urinary tract cancer	-0.464506	0.00646317	33	5
CTRS_2617	MLS004683642	endometrium cancer	-0.463663	0.00657341	33	5
CTRS_7438	PD153035 (Hydrochloride)	skin cancer	-0.463288	0.00662304	33	5
CTRS_3806	BRD-A86708339	large intestine cancer	-0.462497	0.00672867	33	5
CTRS_5644	Vandetanib	non-haematopoietic and non-lymphoid cancer	-0.462374	0.00674523	33	5
CTRS_3549	MGCD-265	kidney cancer	-0.462251	0.00676182	33	5
CTRS_9631	FSC231	urinary tract cancer	-0.461334	0.0068866	33	5
CTRS_1844	YK 4-279	breast cancer	-0.461083	0.00692113	33	5
CTRS_8133	STK219801	stomach cancer	-0.460731	0.00696966	33	5
CTRS_5256	BRD-K27986637	non-haematopoietic and non-lymphoid cancer	-0.460373	0.00701952	33	5
CTRS_9280	Dactolisib	upper aerodigestive tract cancer	-0.460232	0.00703911	33	5
CTRS_2692	Procarbazine	endometrium cancer	-0.458562	0.00727576	33	5
CTRS_3673	SGX-523	kidney cancer	-0.458156	0.00733434	33	5
CTRS_1003	BRD-K50799972	bone cancer	-0.45698	0.0075061	33	5
CTRS_9862	Teniposide	urinary tract cancer	-0.455533	0.00772225	33	5
CTRS_1679	Necrostatin	breast cancer	-0.453952	0.00796456	33	5
CTRS_5694	AZD-1152-HQPA	oesophagus cancer	-0.453506	0.00803409	33	5
CTRS_3395	ICG-001	kidney cancer	-0.452089	0.00825813	33	5
CTRS_9518	BRD-K48334597-001-01-9	urinary tract cancer	-0.451795	0.00830534	33	5
CTRS_507	AZD-6482	autonomic ganglia cancer	-0.450535	0.00851014	33	5
CTRS_5686	AZD-1480	oesophagus cancer	-0.450462	0.00852211	33	5
CTRS_2389	BRD-K16147474	endometrium cancer	-0.4499	0.00861505	33	5
CTRS_9888	VER 155008	urinary tract cancer	-0.449864	0.008621	33	5
CTRS_3948	Fingolimod (FTY720) HCl	large intestine cancer	-0.449425	0.00869404	33	5
CTRS_1498	ZINC01050121	breast cancer	-0.449055	0.00875619	33	5
CTRS_9452	Azacitidine	urinary tract cancer	-0.447132	0.00908484	33	5
CTRS_9749	NSC30930	urinary tract cancer	-0.44673	0.00915488	33	5
CTRS_7538	Tosedostat	skin cancer	-0.446406	0.00921151	33	5
CTRS_8297	DASA-58	stomach cancer	-0.445326	0.00940286	33	5
CTRS_1327	TG100-115	bone cancer	-0.445205	0.00942452	33	5
CTRS_9379	Tacedinaline	upper aerodigestive tract cancer	-0.444554	0.00954175	33	5
CTRS_8105	BRD-K61166597	stomach cancer	-0.444227	0.00960107	33	5
CTRS_9092	CCT036477	upper aerodigestive tract cancer	-0.44347	0.00973959	33	5
CTRS_6277	Canertinib	ovary cancer	-0.44343	0.00974698	33	5
CTRS_8995	BIX01294	upper aerodigestive tract cancer	-0.44284	0.00985626	33	5
CTRS_9271	NSC19630	upper aerodigestive tract cancer	-0.442666	0.00988854	33	5
CTRS_3716	Tivozanib	kidney cancer	-0.442448	0.00992927	33	5
CTRS_9357	Sirolimus	upper aerodigestive tract cancer	-0.441824	0.0100468	33	5
CTRS_9892	CHEMBL492797	urinary tract cancer	-0.440895	0.0102236	33	5
CTRS_671	GSK-1059615	autonomic ganglia cancer	-0.440868	0.0102287	33	5
CTRS_9495	BRD-K14844214	urinary tract cancer	-0.440143	0.0103687	33	5
CTRS_8464	UNC0638	stomach cancer	-0.439712	0.0104528	33	5
CTRS_9890	vorapaxar	urinary tract cancer	-0.43857	0.0106779	33	5
CTRS_4072	NSC23766	large intestine cancer	-0.437039	0.0109863	33	5
CTRS_126	CID-2858522	CTRP cell lines	-0.436318	0.0111341	33	5
CTRS_714	LE-135	autonomic ganglia cancer	-0.435648	0.011273	33	5
CTRS_8038	CYTO7H11	stomach cancer	-0.435174	0.0113723	33	5
CTRS_3536	Lomeguatrib	kidney cancer	-0.433436	0.011742	33	5
CTRS_1605	Evodiamine	breast cancer	-0.433072	0.0118205	33	5
CTRS_9593	CHEMBL520231	urinary tract cancer	-0.432591	0.0119253	33	5
CTRS_3564	ML239	kidney cancer	-0.432575	0.0119288	33	5
CTRS_3973	HBX-41108	large intestine cancer	-0.432514	0.0119421	33	5
CTRS_8406	Semagacestat	stomach cancer	-0.432035	0.0120474	33	5
CTRS_2658	OSI-930	endometrium cancer	-0.431351	0.0121988	33	5
CTRS_3430	CIL55A	kidney cancer	-0.431307	0.0122086	33	5
CTRS_3623	PF-184	kidney cancer	-0.430476	0.012395	33	5
CTRS_4009	Panobinostat	large intestine cancer	-0.429692	0.0125731	33	5
CTRS_6408	LY2157299	ovary cancer	-0.428595	0.0128257	33	5
CTRS_8381	Purmorphamine	stomach cancer	-0.428397	0.0128717	33	5
CTRS_753	Momelotinib	autonomic ganglia cancer	-0.427852	0.0129992	33	5
CTRS_3838	BRD-K42260513	large intestine cancer	-0.427493	0.0130838	33	5
CTRS_4104	PF-4800567 hydrochloride	large intestine cancer	-0.427412	0.0131028	33	5
CTRS_3369	BRD-K51831558	kidney cancer	-0.427133	0.0131692	33	5
CTRS_4071	NSC19630	large intestine cancer	-0.427012	0.0131979	33	5
CTRS_7426	Oligomycin A	skin cancer	-0.426588	0.0132989	33	5
CTRS_434	XL335	CTRP cell lines	-0.426525	0.0133141	33	5
CTRS_8093	BRD-K41597374	stomach cancer	-0.426096	0.0134173	33	5
CTRS_3322	bleomycin A2	kidney cancer	-0.425222	0.0136295	33	5
CTRS_9695	LY 2183240	urinary tract cancer	-0.422383	0.0143384	33	5
CTRS_2312	CHEMBL492797	central nervous system cancer	-0.421958	0.0144472	33	5
CTRS_5786	ICG-001	oesophagus cancer	-0.421824	0.0144817	33	5
CTRS_6848	IC-87114	pancreas cancer	-0.421103	0.0146681	33	5
CTRS_3486	Gossypol	kidney cancer	-0.420047	0.0149447	33	5
CTRS_9475	bleomycin A2	urinary tract cancer	-0.420019	0.0149521	33	5
CTRS_7239	ceranib-2	skin cancer	-0.419621	0.0150576	33	5
CTRS_3313	Bendamustine HCl	kidney cancer	-0.417561	0.0156133	33	5
CTRS_9844	spautin-1	urinary tract cancer	-0.417419	0.0156524	33	5
CTRS_9108	CIL55A	upper aerodigestive tract cancer	-0.417266	0.0156943	33	5
CTRS_4162	67200-34-4	large intestine cancer	-0.416426	0.0159268	33	5
CTRS_2425	BRD-K71781559	endometrium cancer	-0.416247	0.0159767	33	5
CTRS_6150	ABT737	ovary cancer	-0.415674	0.0161375	33	5
CTRS_2655	Oligomycin A	endometrium cancer	-0.415629	0.0161501	33	5
CTRS_3907	CIL55A	large intestine cancer	-0.415442	0.016203	33	5
CTRS_9456	AZD7545	urinary tract cancer	-0.41498	0.0163337	33	5
CTRS_3324	BMS-270394	kidney cancer	-0.41473	0.0164052	33	5
CTRS_9051	CHEMBL2355724	upper aerodigestive tract cancer	-0.414622	0.0164359	33	5
CTRS_6670	179324-69-7	pancreas cancer	-0.413999	0.0166149	33	5
CTRS_1574	FSC231	breast cancer	-0.413216	0.016842	33	5
CTRS_4940	CAY10603	lung cancer	-0.412581	0.0170281	33	5
CTRS_8947	Sepantronium	thyroid cancer	-0.41226	0.0171231	33	5
CTRS_7550	Valdecoxib	skin cancer	-0.411897	0.0172308	33	5
CTRS_3233	temozolomide	haematopoietic and lymphoid tissue cancer	-0.409978	0.0178093	33	5
CTRS_1175	MI-1	bone cancer	-0.409554	0.0179392	33	5
CTRS_3427	CID-5951923	kidney cancer	-0.409431	0.0179771	33	5
CTRS_800	CHEMBL416418	autonomic ganglia cancer	-0.408578	0.0182415	33	5
CTRS_5252	CHEMBL3182046	non-haematopoietic and non-lymphoid cancer	-0.408165	0.0183706	33	5
CTRS_9509	SCHEMBL15422028	urinary tract cancer	-0.407647	0.0185338	33	5
CTRS_8048	birinapant	stomach cancer	-0.407581	0.0185546	33	5
CTRS_3030	SMR000075319	haematopoietic and lymphoid tissue cancer	-0.407319	0.0186377	33	5
CTRS_3816	BRD-K14844214	large intestine cancer	-0.407009	0.0187364	33	5
CTRS_9335	BL003-049-HDAC3	upper aerodigestive tract cancer	-0.406912	0.0187673	33	5
CTRS_4061	necrosulfonamide	large intestine cancer	-0.40616	0.0190085	33	5
CTRS_853	Simvastatin	autonomic ganglia cancer	-0.405756	0.0191394	33	5
CTRS_905	Vandetanib	autonomic ganglia cancer	-0.405542	0.019209	33	5
CTRS_6288	Ch-55	ovary cancer	-0.40524	0.0193077	33	5
CTRS_929	Afatinib	bone cancer	-0.405174	0.0193292	33	5
CTRS_4090	Ouabain	large intestine cancer	-0.404837	0.0194397	33	5
CTRS_359	spautin-1	CTRP cell lines	-0.404758	0.0194656	33	5
CTRS_4200	Trametinib	large intestine cancer	-0.404598	0.0195184	33	5
CTRS_3630	Phloretin	kidney cancer	-0.4044	0.0195838	33	5
CTRS_4366	CAY10618	liver cancer	-0.404222	0.0196428	33	5
CTRS_1147	KU0060648	bone cancer	-0.404041	0.019703	33	5
CTRS_3882	Alpelisib	large intestine cancer	-0.40321	0.0199807	33	5
CTRS_6419	MI-1	ovary cancer	-0.403133	0.0200066	33	5
CTRS_1931	BRD-K35604418	central nervous system cancer	-0.403006	0.0200494	33	5
CTRS_5246	BRD-K09587429	non-haematopoietic and non-lymphoid cancer	-0.402866	0.0200966	33	5
CTRS_6507	pluripotin	ovary cancer	-0.401773	0.0204689	33	5
CTRS_8342	Oligomycin A	stomach cancer	-0.401713	0.0204895	33	5
CTRS_89	compound 1B	CTRP cell lines	-0.40135	0.0206147	33	5
CTRS_4782	CHEMBL2355345	lung cancer	-0.401224	0.0206583	33	5
CTRS_2279	Tanespimycin	central nervous system cancer	-0.399623	0.0212178	33	5
CTRS_9603	Dacarbazine	urinary tract cancer	-0.399606	0.0212239	33	5
CTRS_1858	Afatinib	central nervous system cancer	-0.399296	0.0213338	33	5
CTRS_7632	BRD-K17060750	soft tissue cancer	-0.399173	0.0213776	33	5
CTRS_8274	LY2157299	stomach cancer	-0.399157	0.0213832	33	5
CTRS_8859	Regorafenib	thyroid cancer	-0.398991	0.0214421	33	5
CTRS_6781	COL-3	pancreas cancer	-0.398782	0.0215169	33	5
CTRS_6453	neopeltolide	ovary cancer	-0.398442	0.0216387	33	5
CTRS_3971	GW 405833	large intestine cancer	-0.398066	0.0217743	33	5
CTRS_5341	CIL56	non-haematopoietic and non-lymphoid cancer	-0.397887	0.0218389	33	5
CTRS_348	Fingolimod (FTY720) HCl	CTRP cell lines	-0.397879	0.0218418	33	5
CTRS_5376	etomoxir	non-haematopoietic and non-lymphoid cancer	-0.396877	0.0222072	33	5
CTRS_6011	Pazopanib	oesophagus cancer	-0.396659	0.0222875	33	5
CTRS_4174	StemRegenin 1	large intestine cancer	-0.39649	0.0223495	33	5
CTRS_235	BRD-K71781559	CTRP cell lines	-0.395653	0.0226603	33	5
CTRS_6835	GSK-1059615	pancreas cancer	-0.395359	0.0227704	33	5
CTRS_9050	BRD-K61166597	upper aerodigestive tract cancer	-0.395027	0.0228949	33	5
CTRS_6639	AZ-3146	pancreas cancer	-0.394383	0.0231384	33	5
CTRS_5984	501919-59-1	oesophagus cancer	-0.394273	0.0231804	33	5
CTRS_5129	Sunitinib	lung cancer	-0.394204	0.0232066	33	5
CTRS_9502	BRD-K27986637	urinary tract cancer	-0.393931	0.0233109	33	5
CTRS_3610	OSI-930	kidney cancer	-0.393594	0.0234399	33	5
CTRS_3697	Sunitinib	kidney cancer	-0.393245	0.0235742	33	5
CTRS_6962	palmostatin B	pancreas cancer	-0.393114	0.0236245	33	5
CTRS_2439	BRD-K97651142	endometrium cancer	-0.392438	0.023887	33	5
CTRS_876	Tamoxifen	autonomic ganglia cancer	-0.392406	0.0238996	33	5
CTRS_5460	MG-132	non-haematopoietic and non-lymphoid cancer	-0.391948	0.0240786	33	5
CTRS_3310	BCL-LZH-4	kidney cancer	-0.391778	0.0241455	33	5
CTRS_556	BRD-K37390332	autonomic ganglia cancer	-0.391601	0.0242153	33	5
CTRS_9723	ML320	urinary tract cancer	-0.39156	0.0242312	33	5
CTRS_704	KPT185	autonomic ganglia cancer	-0.390993	0.024456	33	5
CTRS_8850	Purmorphamine	thyroid cancer	-0.390846	0.0245143	33	5
CTRS_3864	CHEMBL2152368	large intestine cancer	-0.390366	0.0247061	33	5
CTRS_9692	AC1MSUFC	urinary tract cancer	-0.389228	0.0251658	33	5
CTRS_9439	AGK 2	urinary tract cancer	-0.388804	0.0253388	33	5
CTRS_3649	Pyrazolanthrone	kidney cancer	-0.388656	0.0253995	33	5
CTRS_4283	BRD-A02303741	liver cancer	-0.388209	0.0255833	33	5
CTRS_5729	BRD-K13999467	oesophagus cancer	-0.387426	0.0259079	33	5
CTRS_8091	BRD-K37390332	stomach cancer	-0.386859	0.0261451	33	5
CTRS_9740	Neratinib	urinary tract cancer	-0.386475	0.0263068	33	5
CTRS_2642	NSC30930	endometrium cancer	-0.386218	0.0264156	33	5
CTRS_9775	PD318088	urinary tract cancer	-0.386176	0.0264336	33	5
CTRS_9408	UNC0638	upper aerodigestive tract cancer	-0.38592	0.0265422	33	5
CTRS_9803	PYR-41	urinary tract cancer	-0.385468	0.0267349	33	5
CTRS_9209	Panobinostat	upper aerodigestive tract cancer	-0.38536	0.026781	33	5
CTRS_6628	Alisertib	pancreas cancer	-0.383904	0.0274108	33	5
CTRS_8236	Ifosfamide	stomach cancer	-0.383749	0.0274783	33	5
CTRS_6050	RG 108	oesophagus cancer	-0.383711	0.027495	33	5
CTRS_4932	Ifosfamide	lung cancer	-0.383426	0.0276201	33	5
CTRS_8486	3-Cl-AHPC	thyroid cancer	-0.383339	0.0276583	33	5
CTRS_1551	Decitabine	breast cancer	-0.382994	0.0278102	33	5
CTRS_6124	Valdecoxib	oesophagus cancer	-0.382974	0.027819	33	5
CTRS_9829	CHEMBL258148	urinary tract cancer	-0.382703	0.0279392	33	5
CTRS_9013	BRD-K04800985	upper aerodigestive tract cancer	-0.382301	0.028118	33	5
CTRS_9738	Nelarabine	urinary tract cancer	-0.382156	0.0281826	33	5
CTRS_7282	Entinostat	skin cancer	-0.382066	0.0282229	33	5
CTRS_127	temozolomide	CTRP cell lines	-0.381899	0.0282974	33	5
CTRS_875	Tamatinib	autonomic ganglia cancer	-0.381807	0.0283387	33	5
CTRS_3715	Tivantinib	kidney cancer	-0.380976	0.0287138	33	5
CTRS_3782	CYTO7H11	large intestine cancer	-0.380512	0.0289249	33	5
CTRS_3431	CIL56	kidney cancer	-0.38031	0.029017	33	5
CTRS_3712	Tigecycline	kidney cancer	-0.38026	0.0290397	33	5
CTRS_4112	Pifithrin MU	large intestine cancer	-0.379655	0.029318	33	5
CTRS_3489	GSK2636771	kidney cancer	-0.379076	0.0295859	33	5
CTRS_683	Ibrutinib (PCI-32765)	autonomic ganglia cancer	-0.379003	0.0296201	33	5
CTRS_7840	nakiterpiosin	soft tissue cancer	-0.378802	0.0297135	33	5
CTRS_3608	Omacetaxine Mepesuccinate	kidney cancer	-0.37878	0.0297237	33	5
CTRS_8253	KHS101	stomach cancer	-0.37868	0.0297705	33	5
CTRS_5643	Valdecoxib	non-haematopoietic and non-lymphoid cancer	-0.378548	0.0298322	33	5
CTRS_9012	BRD-K02492147	upper aerodigestive tract cancer	-0.378176	0.0300068	33	5
CTRS_8434	SZ4TA2	stomach cancer	-0.378111	0.0300372	33	5
CTRS_3525	KU-60019	kidney cancer	-0.377891	0.0301407	33	5
CTRS_2768	Trametinib	endometrium cancer	-0.377656	0.0302518	33	5
CTRS_5208	AZD7545	non-haematopoietic and non-lymphoid cancer	-0.377641	0.030259	33	5
CTRS_2862	BRD-K11533227	haematopoietic and lymphoid tissue cancer	-0.376879	0.0306215	33	5
CTRS_8827	PF-184	thyroid cancer	-0.376731	0.0306925	33	5
CTRS_8063	Merck-Ketone	stomach cancer	-0.376681	0.0307161	33	5
CTRS_8347	PAC-1	stomach cancer	-0.37621	0.0309428	33	5
CTRS_9570	O-Demethylated Adapalene	urinary tract cancer	-0.376141	0.0309757	33	5
CTRS_3667	SB-743921	kidney cancer	-0.375687	0.0311956	33	5
CTRS_8022	austocystin D	stomach cancer	-0.375458	0.0313067	33	5
CTRS_3558	SMR000068650	kidney cancer	-0.375329	0.0313697	33	5
CTRS_276	Afatinib	CTRP cell lines	-0.375266	0.0314006	33	5
CTRS_32	Cyclophosphamide	CTRP cell lines	-0.374923	0.031568	33	5
CTRS_984	BRD-K13999467	bone cancer	-0.374842	0.0316079	33	5
CTRS_5938	4LY1	oesophagus cancer	-0.374399	0.0318258	33	5
CTRS_5280	BRD-K52037352	non-haematopoietic and non-lymphoid cancer	-0.374383	0.0318336	33	5
CTRS_554	SCHEMBL15422028	autonomic ganglia cancer	-0.374329	0.0318605	33	5
CTRS_124	Vandetanib	CTRP cell lines	-0.374293	0.0318778	33	5
CTRS_6942	NSC30930	pancreas cancer	-0.372584	0.0327311	33	5
CTRS_9825	Selumetinib	urinary tract cancer	-0.372396	0.0328264	33	5
CTRS_5371	Entinostat	non-haematopoietic and non-lymphoid cancer	-0.372357	0.0328461	33	5
CTRS_8357	Pevonedistat	stomach cancer	-0.372265	0.0328925	33	5
CTRS_8965	AT-406	upper aerodigestive tract cancer	-0.372248	0.0329011	33	5
CTRS_2330	ABT737	endometrium cancer	-0.372026	0.033014	33	5
CTRS_9081	Brefeldin A	upper aerodigestive tract cancer	-0.371595	0.0332334	33	5
CTRS_9385	temozolomide	upper aerodigestive tract cancer	-0.371471	0.0332967	33	5
CTRS_5362	Dasatinib	non-haematopoietic and non-lymphoid cancer	-0.371406	0.03333	33	5
CTRS_4144	SB-431542	large intestine cancer	-0.37134	0.0333639	33	5
CTRS_8163	CIL55A	stomach cancer	-0.371317	0.0333759	33	5
CTRS_270	BRD-K50799972	CTRP cell lines	-0.371288	0.0333908	33	5
CTRS_8280	4LY1	stomach cancer	-0.371245	0.0334129	33	5
CTRS_3719	TPCA-1	kidney cancer	-0.371214	0.0334284	33	5
CTRS_3879	32703-82-5	large intestine cancer	-0.371045	0.0335156	33	5
CTRS_9079	ZINC01050121	upper aerodigestive tract cancer	-0.370878	0.0336017	33	5
CTRS_9349	Selumetinib	upper aerodigestive tract cancer	-0.37057	0.0337608	33	5
CTRS_6746	STK219801	pancreas cancer	-0.370517	0.033788	33	5
CTRS_2511	Erismodegib	endometrium cancer	-0.370495	0.0337996	33	5
CTRS_2031	DOCETAXEL	central nervous system cancer	-0.370402	0.0338478	33	5
CTRS_1438	BRD-K17060750	breast cancer	-0.370251	0.033926	33	5
CTRS_9234	MK-2206	upper aerodigestive tract cancer	-0.369941	0.0340872	33	5
CTRS_9882	UNC-0321	urinary tract cancer	-0.369835	0.0341427	33	5
CTRS_914	WZ 4002	autonomic ganglia cancer	-0.369036	0.0345621	33	5
CTRS_6064	Semagacestat	oesophagus cancer	-0.368815	0.0346786	33	5
CTRS_7672	BRD-8899	soft tissue cancer	-0.368491	0.0348503	33	5
CTRS_9633	Fumonisin-B1	urinary tract cancer	-0.368354	0.0349234	33	5
CTRS_7983	UNC-0321	soft tissue cancer	-0.368085	0.0350666	33	5
CTRS_9778	PF-184	urinary tract cancer	-0.367773	0.0352336	33	5
CTRS_3821	BRD-K26531177	large intestine cancer	-0.367556	0.0353498	33	5
CTRS_9625	Fingolimod (FTY720) HCl	urinary tract cancer	-0.367447	0.0354085	33	5
CTRS_6985	SCHEMBL15444220	pancreas cancer	-0.367174	0.0355555	33	5
CTRS_211	BRD-K09587429	CTRP cell lines	-0.366634	0.0358481	33	5
CTRS_1153	L-685458	bone cancer	-0.366444	0.0359513	33	5
CTRS_9407	UNC-0321	upper aerodigestive tract cancer	-0.366439	0.0359542	33	5
CTRS_8401	SB525334	stomach cancer	-0.366116	0.0361304	33	5
CTRS_8955	Arachidonyl Trifluoromethylketone	upper aerodigestive tract cancer	-0.366115	0.0361312	33	5
CTRS_7181	BRD-K37390332	skin cancer	-0.366109	0.0361343	33	5
CTRS_623	compound 1B	autonomic ganglia cancer	-0.366035	0.0361747	33	5
CTRS_1594	HC-067047	breast cancer	-0.366005	0.0361911	33	5
CTRS_6632	AT-406	pancreas cancer	-0.365997	0.0361953	33	5
CTRS_1534	compound 1B	breast cancer	-0.36548	0.0364793	33	5
CTRS_3252	PG 490	haematopoietic and lymphoid tissue cancer	-0.365473	0.0364832	33	5
CTRS_3880	Brefeldin A	large intestine cancer	-0.363778	0.0374271	33	5
CTRS_5250	BRD-K16147474	non-haematopoietic and non-lymphoid cancer	-0.363475	0.0375981	33	5
CTRS_2299	PG 490	central nervous system cancer	-0.363469	0.0376013	33	5
CTRS_9897	SAR245409	urinary tract cancer	-0.363105	0.0378077	33	5
CTRS_9674	KI8751	urinary tract cancer	-0.362678	0.0380504	33	5
CTRS_9485	BRD-A71883111	urinary tract cancer	-0.362133	0.038362	33	5
CTRS_4813	Broad-Sai-560	lung cancer	-0.362066	0.0384006	33	5
CTRS_6768	Chlorambucil	pancreas cancer	-0.361659	0.038635	33	5
CTRS_536	BRD-A86708339	autonomic ganglia cancer	-0.361243	0.0388758	33	5
CTRS_7827	DASA-58	soft tissue cancer	-0.360262	0.0394484	33	5
CTRS_2183	Omacetaxine Mepesuccinate	central nervous system cancer	-0.359977	0.0396157	33	5
CTRS_1958	Broad-Sai-560	central nervous system cancer	-0.359889	0.0396679	33	5
CTRS_3865	BRD-K92856060	large intestine cancer	-0.358764	0.0403355	33	5
CTRS_5334	CL-976	non-haematopoietic and non-lymphoid cancer	-0.358714	0.0403655	33	5
CTRS_2441	BRD-M00053801	endometrium cancer	-0.358444	0.0405273	33	5
CTRS_7213	BRD-K97651142	skin cancer	-0.357563	0.0410585	33	5
CTRS_2200	PF-4800567 hydrochloride	central nervous system cancer	-0.357045	0.0413735	33	5
CTRS_9007	BRD-A71883111	upper aerodigestive tract cancer	-0.35604	0.04199	33	5
CTRS_3811	BRD-K04800985	large intestine cancer	-0.355581	0.0422743	33	5
CTRS_7385	ML311	skin cancer	-0.355242	0.0424856	33	5
CTRS_2379	BRD-A71883111	endometrium cancer	-0.355205	0.0425083	33	5
CTRS_6093	Tacedinaline	oesophagus cancer	-0.355005	0.0426333	33	5
CTRS_6722	BRD-K66532283	pancreas cancer	-0.354711	0.0428173	33	5
CTRS_9299	PD318088	upper aerodigestive tract cancer	-0.35467	0.0428429	33	5
CTRS_1283	Saracatinib	bone cancer	-0.354643	0.0428599	33	5
CTRS_9560	C6-ceramide	urinary tract cancer	-0.354403	0.043011	33	5
CTRS_3559	BAS 02002358	kidney cancer	-0.354203	0.043137	33	5
CTRS_9790	Piplartine	urinary tract cancer	-0.353646	0.0434896	33	5
CTRS_6755	Canertinib	pancreas cancer	-0.353419	0.0436333	33	5
CTRS_6630	AM-580	pancreas cancer	-0.353377	0.0436601	33	5
CTRS_9455	AZD-6482	urinary tract cancer	-0.353301	0.0437089	33	5
CTRS_3306	MLS000709026	kidney cancer	-0.353292	0.0437142	33	5
CTRS_9719	ML239	urinary tract cancer	-0.353222	0.0437591	33	5
CTRS_238	ML312	CTRP cell lines	-0.353211	0.0437664	33	5
CTRS_9522	CHEMBL2381520	urinary tract cancer	-0.353152	0.0438039	33	5
CTRS_9700	4LY1	urinary tract cancer	-0.35299	0.0439075	33	5
CTRS_7431	PAC-1	skin cancer	-0.352931	0.0439454	33	5
CTRS_6679	BRD-K02492147	pancreas cancer	-0.352587	0.0441658	33	5
CTRS_2443	BRD1835	endometrium cancer	-0.352323	0.044336	33	5
CTRS_105	MI-1	CTRP cell lines	-0.351899	0.0446099	33	5
CTRS_3448	Dabrafenib	kidney cancer	-0.351867	0.0446305	33	5
CTRS_9283		upper aerodigestive tract cancer	-0.351867	0.0446309	33	5
CTRS_6532	Saracatinib	ovary cancer	-0.35133	0.0449802	33	5
CTRS_4049	MLN 2238	large intestine cancer	-0.351157	0.045093	33	5
CTRS_7664	SPOX1_002925	soft tissue cancer	-0.351007	0.0451912	33	5
CTRS_6061	SCH-529074	oesophagus cancer	-0.350875	0.0452778	33	5
CTRS_3453	DBeQ	kidney cancer	-0.350702	0.0453909	33	5
CTRS_7241	Ch-55	skin cancer	-0.350299	0.0456569	33	5
CTRS_2024	FK 866	central nervous system cancer	-0.350296	0.0456583	33	5
CTRS_6545	CX-4945 (Silmitasertib)	ovary cancer	-0.350062	0.0458136	33	5
CTRS_9607	DBeQ	urinary tract cancer	-0.349935	0.0458972	33	5
CTRS_3397	STK178014	kidney cancer	-0.349932	0.0458996	33	5
CTRS_498	AT 7867	autonomic ganglia cancer	-0.349909	0.0459147	33	5
CTRS_8204	Fingolimod (FTY720) HCl	stomach cancer	-0.349799	0.0459879	33	5
CTRS_1692	NSC23766	breast cancer	-0.349525	0.0461698	33	5
CTRS_5462	MI-1	non-haematopoietic and non-lymphoid cancer	-0.349385	0.0462633	33	5
CTRS_424	LY2157299	CTRP cell lines	-0.348845	0.0466246	33	5
CTRS_5451	LY2157299	non-haematopoietic and non-lymphoid cancer	-0.348845	0.0466246	33	5
CTRS_2059	GMX1778	central nervous system cancer	-0.348503	0.0468547	33	5
CTRS_9450	Axitinib	urinary tract cancer	-0.348344	0.0469623	33	5
CTRS_5413	Ifosfamide	non-haematopoietic and non-lymphoid cancer	-0.34817	0.0470795	33	5
CTRS_2213	pluripotin	central nervous system cancer	-0.348133	0.0471051	33	5
CTRS_1981	Cabozantinib	central nervous system cancer	-0.348119	0.0471141	33	5
CTRS_962	Doramapimod	bone cancer	-0.348073	0.0471453	33	5
CTRS_3720	Trametinib	kidney cancer	-0.347947	0.0472309	33	5
CTRS_3531	LE-135	kidney cancer	-0.34718	0.0477535	33	5
CTRS_9332	R428	upper aerodigestive tract cancer	-0.346881	0.0479584	33	5
CTRS_9590	Fcodpguefhccia-Uhfffaoysa-N	urinary tract cancer	-0.346782	0.0480262	33	5
CTRS_3616	Parbendazole	kidney cancer	-0.346704	0.0480802	33	5
CTRS_7031	67200-34-4	pancreas cancer	-0.346564	0.0481766	33	5
CTRS_585	STK178014	autonomic ganglia cancer	-0.346517	0.048209	33	5
CTRS_6873	KU-60019	pancreas cancer	-0.346425	0.048272	33	5
CTRS_7514	StemRegenin 1	skin cancer	-0.34585	0.0486706	33	5
CTRS_9642	GSK-1059615	urinary tract cancer	-0.345823	0.0486894	33	5
CTRS_6113	TPCA-1	oesophagus cancer	-0.345766	0.0487288	33	5
CTRS_7109	alvocidib	skin cancer	-0.345367	0.0490074	33	5
